# Supplementary material for: Photosensitizer Loaded Nano-Graphene for Multimodality Imaging Guided Tumor Photodynamic Therapy
Source: PubMed Central journal article supplement — Theranostics. 2014 Jan 15;4(3):229–39. doi: 10.7150/thno.8070 (PMC3915087; doi:10.7150/thno.8070), 2014-01-15
Supplement: thnov04p0229s1.pdf [file thnov04p0229s1.pdf]

## Supplementary Material

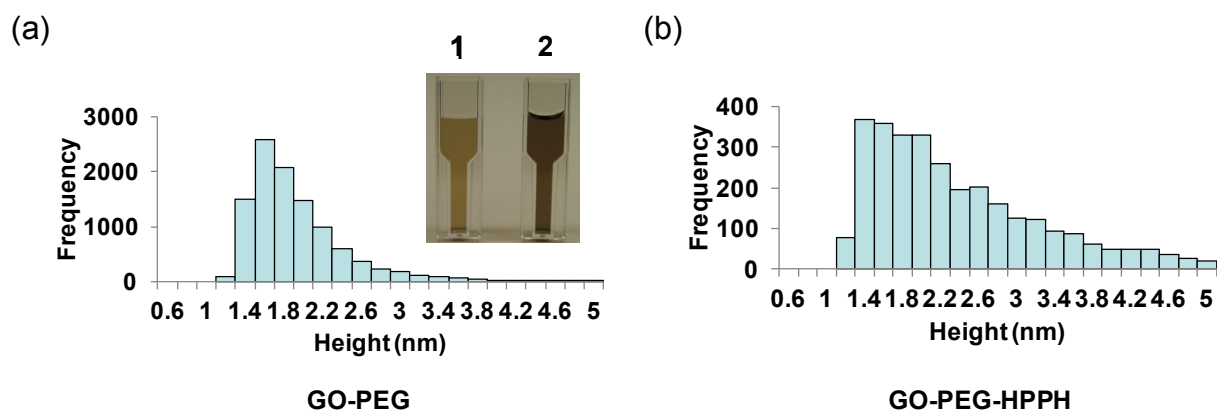

**Figure S1.** Quantification of AFM images of GO-PEG (a) and GO-PEG-HPPH (b) dispersed in ultra-pure water. The inset shows GO-PEG (1) and GO-PEG-HPPH (2) dispersed in ultra-pure water.

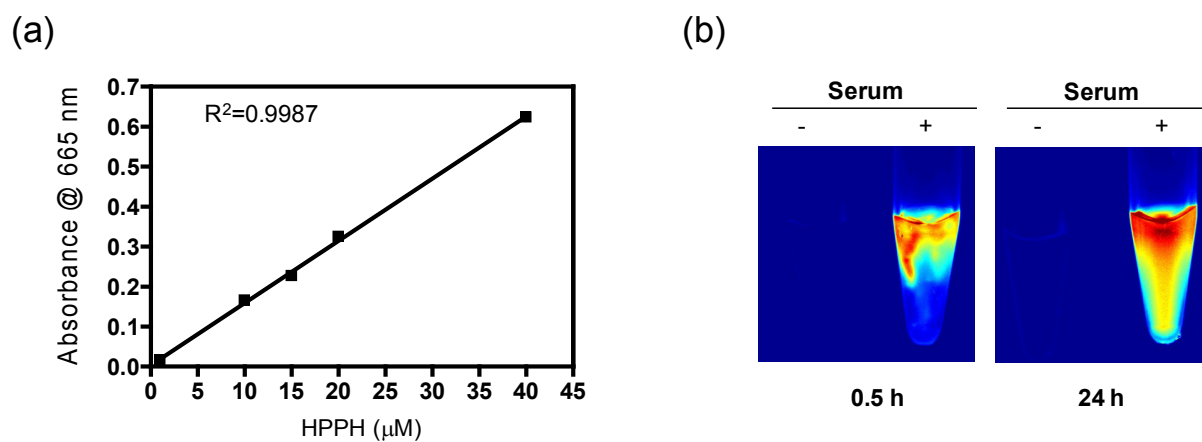

**Figure S2.** a) Linear correlation between HPPH concentration and absorbance at 665 nm. b) Fluorescence imaging of free HPPH with or with serum at 30min and 24 hr.

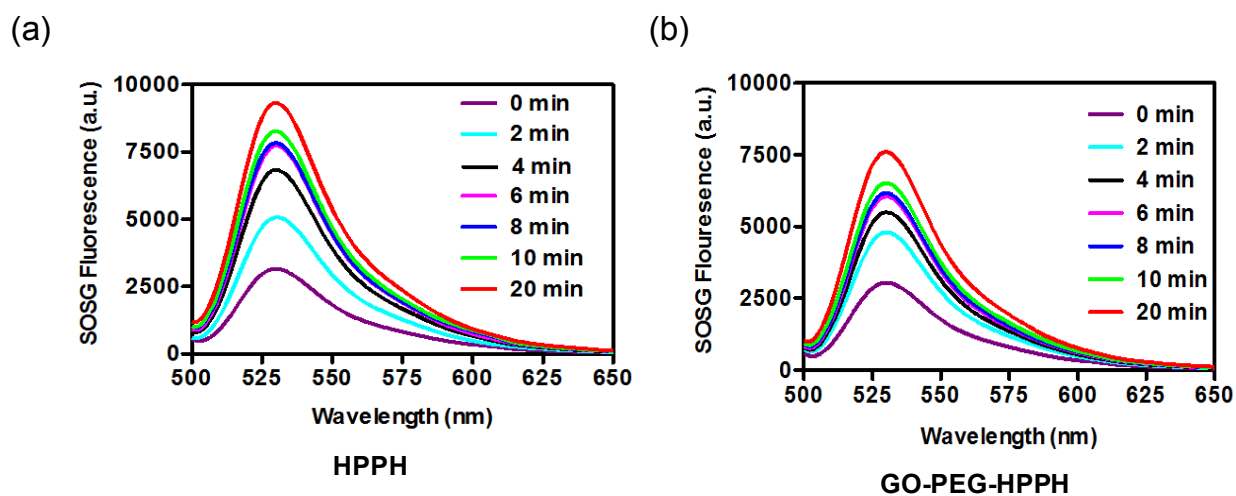

**Figure S3.** SOSG fluorescence intensity (FI) at 530 nm in 1  $\mu\text{M}$  free HPPH (a) and GO-PEG-HPPH (HPPH concentration 1  $\mu\text{M}$ ) (b) after irradiated with 671 nm laser ( $75 \text{ mW}/\text{cm}^2$ ) for different period of time.

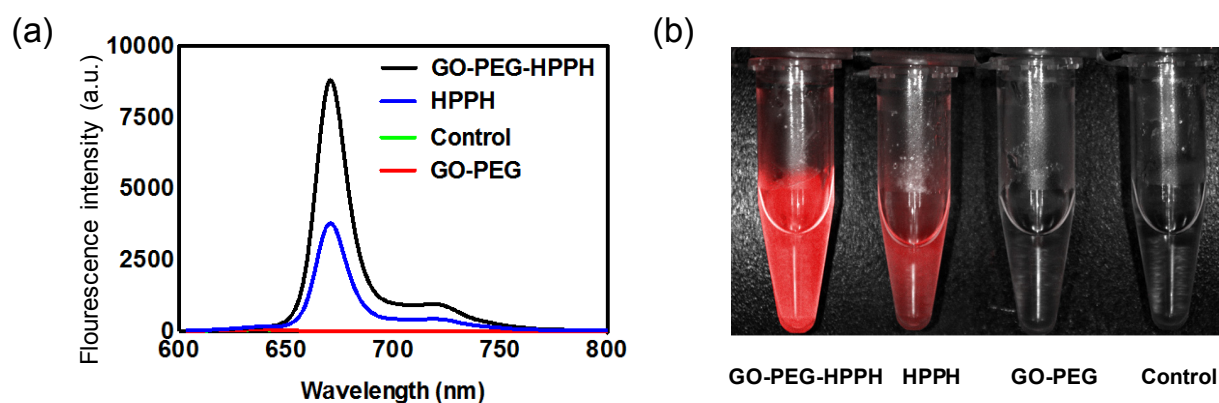

**Figure S4.** a) Fluorescence spectra of cell lysates under 414 nm excitation after incubating the cells with GO-PEG-HPPH, HPPH, GO-PEG or Control (PBS) for 24 hr. b) Fluorescence imaging of cell lysates from cells incubated with GO-PEG-HPPH, HPPH, GO-PEG or Control (PBS) for 24 hr.

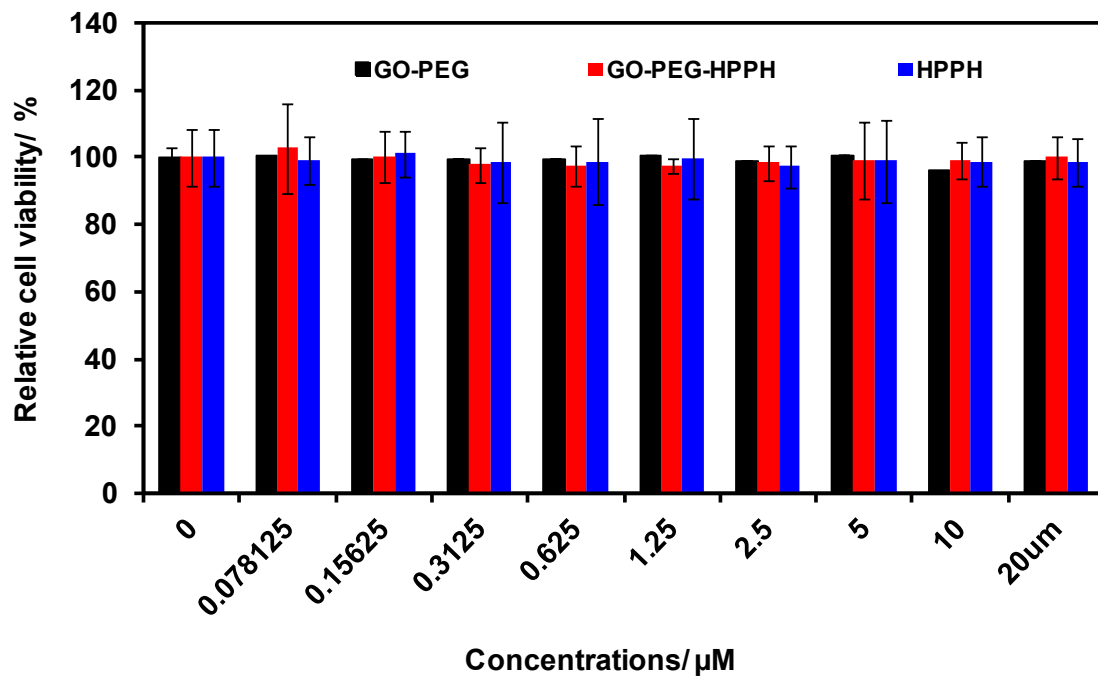

**Figure S5.** Relative viability of 4T1 cells incubated with various concentrations of free HPPH, GO-PEG, and GO-PEG-HPPH without laser irradiation.

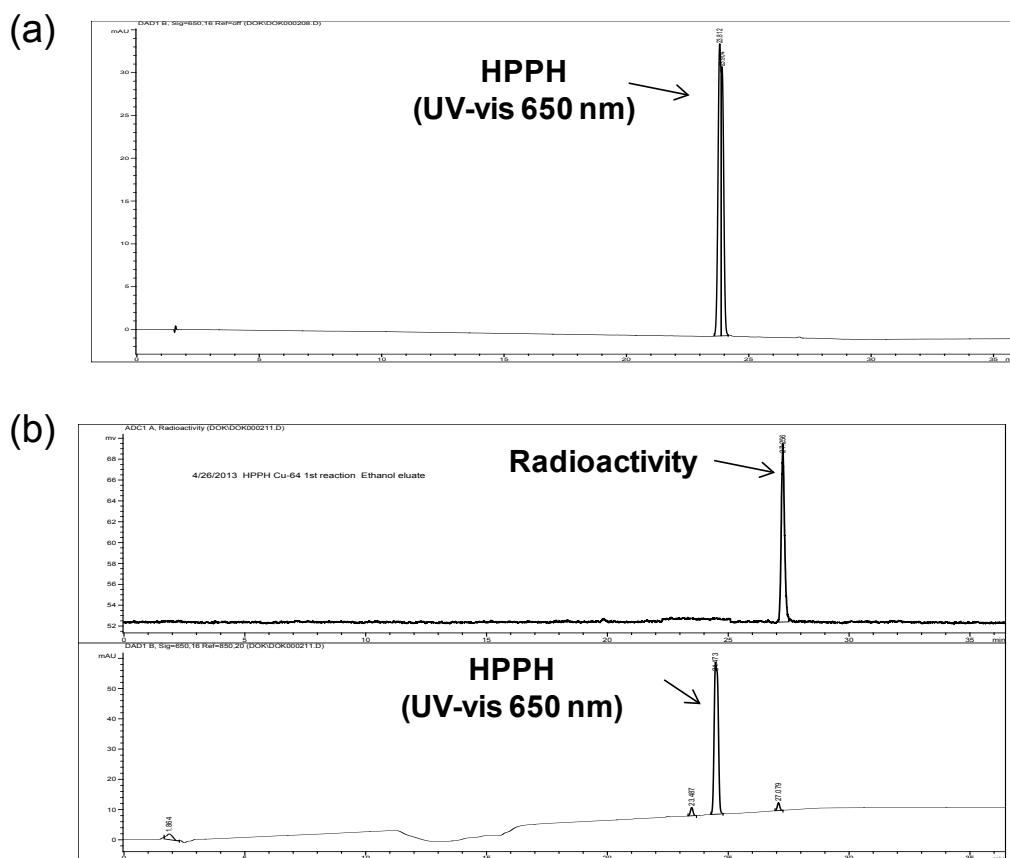

**Figure S6.** Radiolabeling of HPPH with  $^{64}\text{Cu}$ . a) HPLC peak showing HPPH at 650 nm before labeling. b) Radioactivity peak of  $^{64}\text{Cu}$  labeled HPPH (upper) and free HPPH (lower) after  $^{64}\text{Cu}$  labeling. No unlabeled  $^{64}\text{Cu}$  radioactivity peak was detected, indicating all radioactivity was chelated by HPPH.
